# Supplementary material for: Sentinel 1 and 2: Searching for Physical Image Content
Source: Royal Society of Chemistry journal article supplement (doi:10.1039/c6sm01761d), 2013-01-01
Supplement: c6sm01761d2.pdf [file c6sm01761d2.pdf]

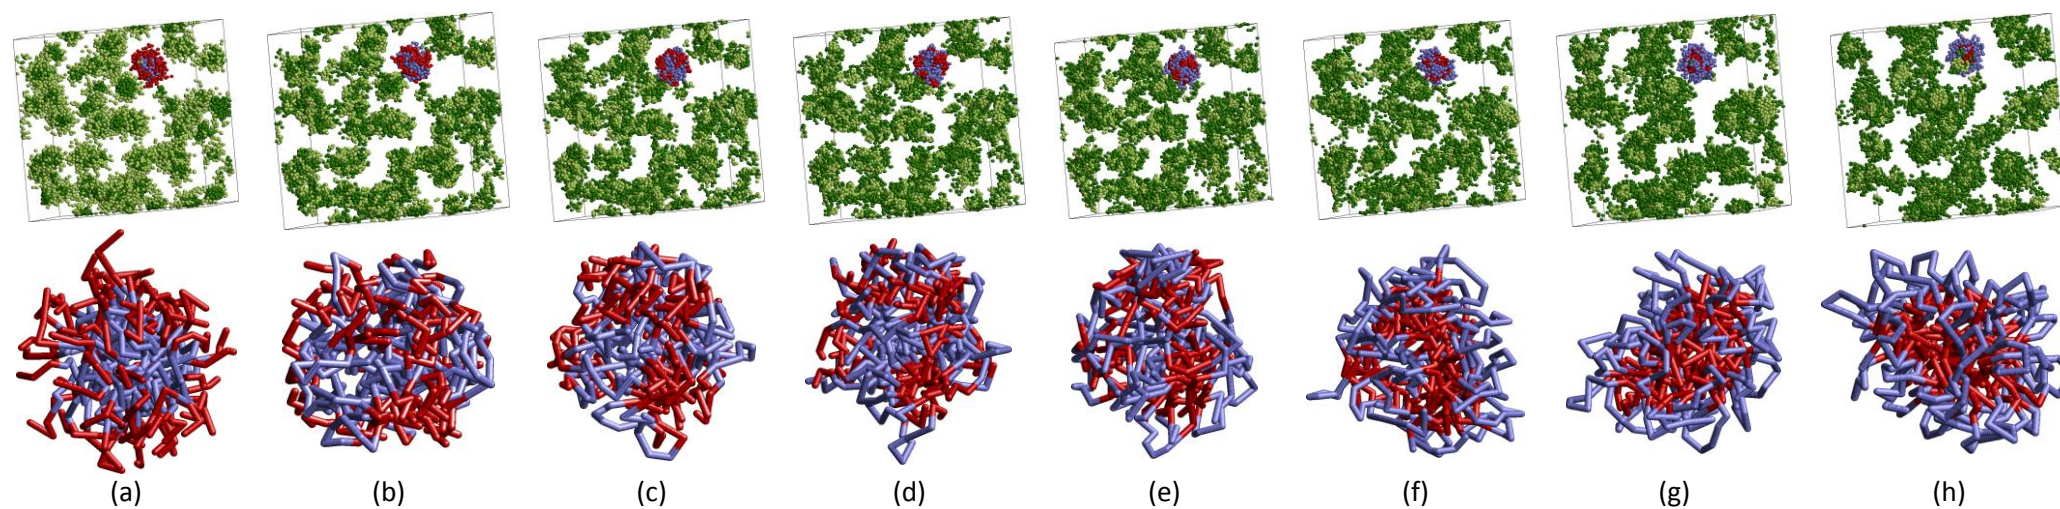

5 vol%  $A_3B_6A_3$  surfactants co-polymers in solvent  $S_1$  changed to solvent  $S_2$ . (a) 0, (b) 370, (c) 750, (d) 1100, (e) 1500, (f) 2410, (g) 4000, and (h) 16000 time steps. Top row is the full box, bottom row is one example micelle.
